# Supplementary material for: A 20-Gene Set Predictive of Progression to Severe Dengue
Source: PubMed Central journal article supplement (PMC6352713; doi:10.1016/j.celrep.2019.01.033), 2019-01-29
Supplement: mmc1.pdf [file mmc1.pdf]

**Cell Reports, Volume 26**

## **Supplemental Information**

### **A 20-Gene Set Predictive of Progression to Severe Dengue**

**Makeda Robinson, Timothy E. Sweeney, Rina Barouch-Bentov, Malaya Kumar Sahoo, Larry Kalesinskas, Francesco Vallania, Ana Maria Sanz, Eliana Ortiz-Lasso, Ludwig Luis Albornoz, Fernando Rosso, Jose G. Montoya, Benjamin A. Pinsky, Purvesh Khatri, and Shirit Einav**

## **Supplemental Information**

### **Supplemental figures**

**Figure S1.** Forest plots of the over-expressed and under-expressed genes derived in the forward searches, Related to Figure 1.

**Figure S2.** Violin plots showing the performance of the 20-gene set to separate DHF/DSS from DF in the 7 datasets of the discovery cohort (A) and 3 datasets of the validation cohort (B), Related to Figure 1.

**Figure S3.** Routine laboratory parameters are ineffective in predicting development of severe dengue and at most part do not correlate with the dengue severity score, Related to Figure 2.

**Figure S4.** Enrichment profiles of the 20 differentially expressed genes in publicly available sorted-cell gene expression profiles and meta-analysis of cell-mixture deconvolution, Related to Figure 1.

### **Supplemental tables**

**Table S1.** Publicly available datasets used for the discovery and validation of the 20-gene set, Related to Figures 1 and 2.

**Table S2.** Over-expressed and under-expressed genes identified in the discovery cohort via the multi-cohort analysis, Related to Figure 1.

**Table S3.** Colombia cohort. Demographic, clinical, and laboratory characteristics of study population, Related to Figure 2.

**Table S4.** Severe dengue patients in the Colombia cohort, Related to Figure 2.

**Table S5.** Demographic and clinical characteristics of the Colombia cohort study population. Excel file, Related to Figure 2.

**Table S6.** Sensitivity and specificity of the 20 gene-set in the pre-existing cohorts and new Colombia cohort, Related to Figures 1 and 2.

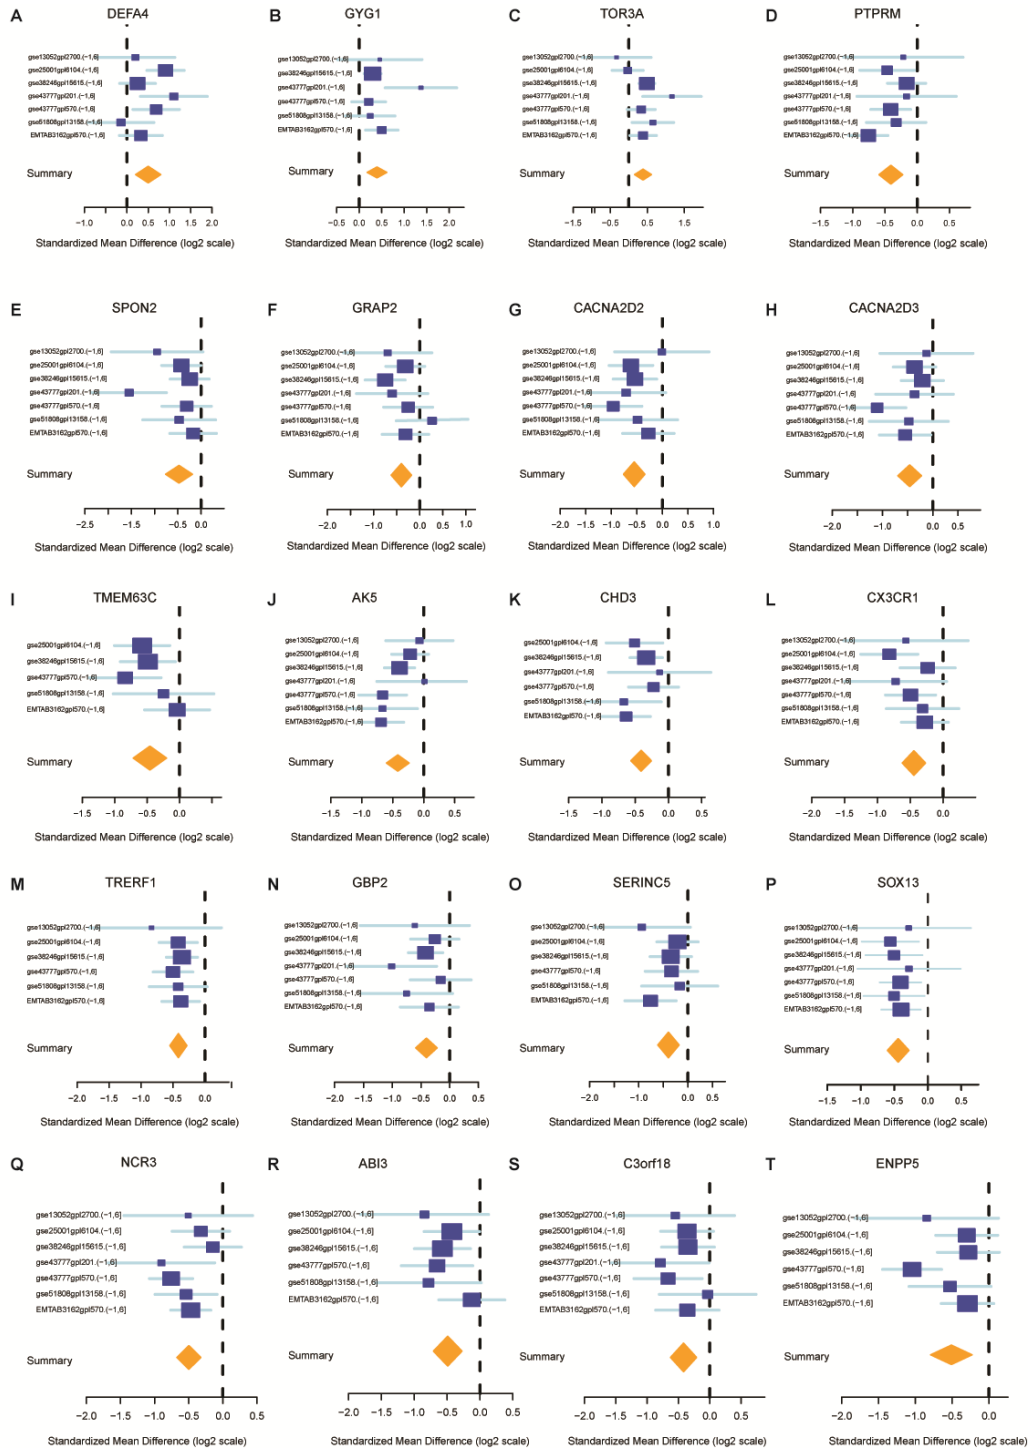

**Figure S1. Forest plots of the over-expressed and under-expressed genes derived in the forward searches, Related to Figure 1.** The x axis represents standardized mean difference between DHF/DSS and DF. The size of the blue rectangles is inversely proportional to the standard error of mean in the study. Whiskers represent the 95% CI. The orange diamonds represent overall, combined mean difference for a given gene. Width of the diamonds represents the 95% CI of overall combined mean difference.

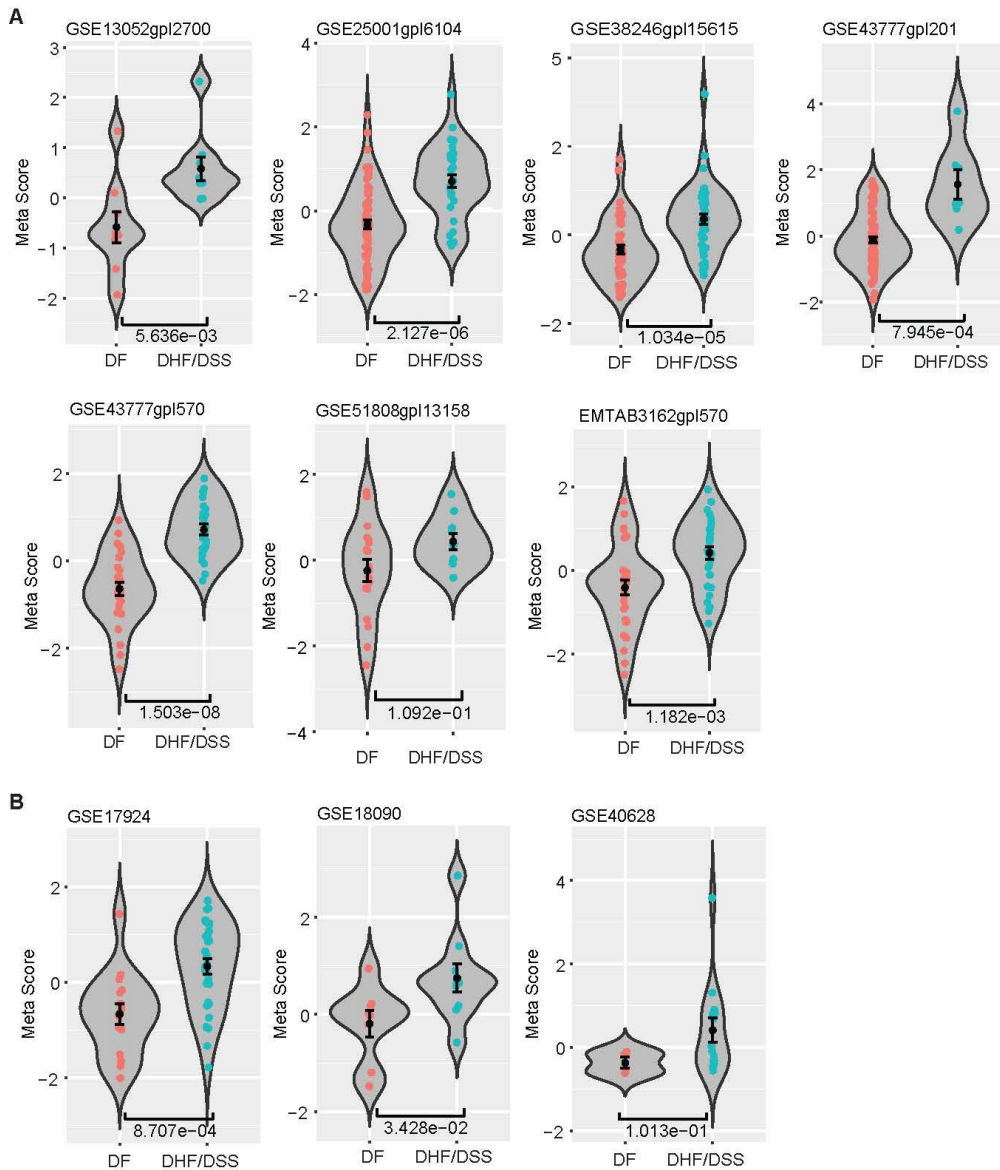

**Figure S2.** Violin plots showing the performance of the 20-gene set to separate DHF/DSS from DF in the 7 datasets of the discovery cohort (A) and 3 datasets of the validation cohort (B), Related to Figure 1. Wilcoxon P values shown. The error bars represent middle quartiles.

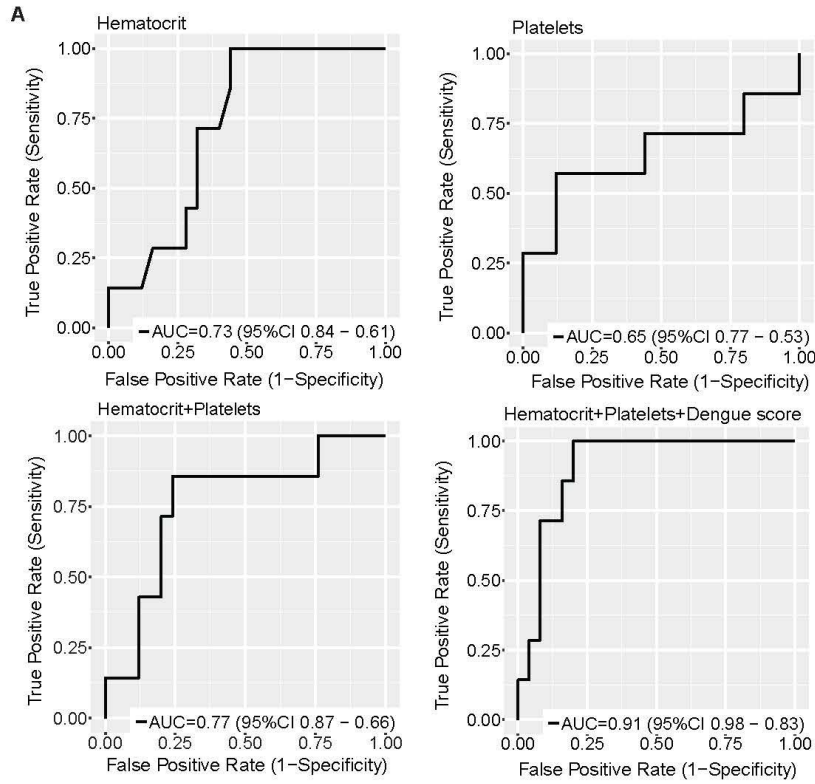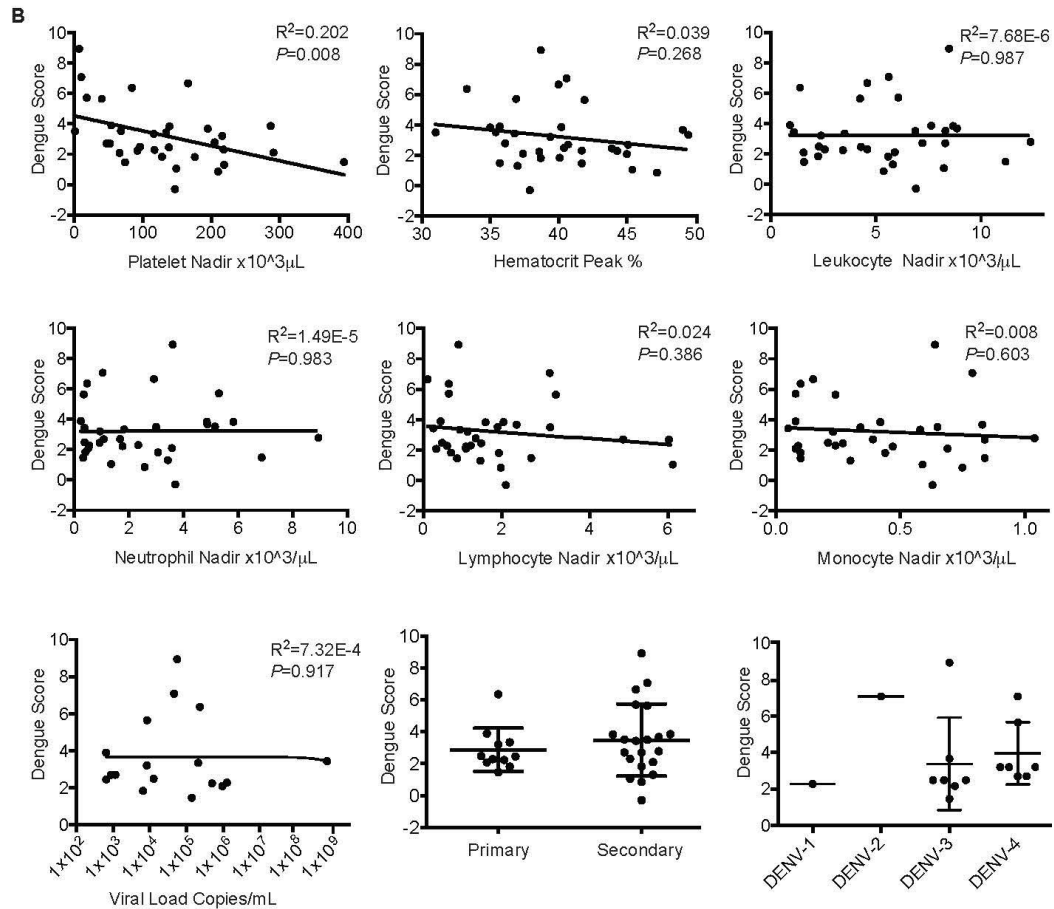

**Figure S3. Routine laboratory parameters are ineffective in predicting development of severe dengue and at most part do not correlate with the dengue severity score, Related to Figure 2.** A. ROC curves comparing patients with SD with patients with D and DWS based on hematocrit level (top left), platelet count (top right), hematocrit level and platelet count (bottom left) upon presentation in the Colombia cohort. Bottom right: ROC curve comparing patients with SD with patients with D and DWS based on the combination of the 20-gene set with hematocrit level and platelet count upon presentation in the Colombia cohort. B. Correlation of the dengue severity score with nadir platelet count, peak hematocrit, nadir of total leukocytes, neutrophils, lymphocytes, monocytes, viral load in serum, prior exposure to dengue, and dengue serotype via linear regression analysis. Mean $\pm$ SD are shown in the lower mid and right panels.

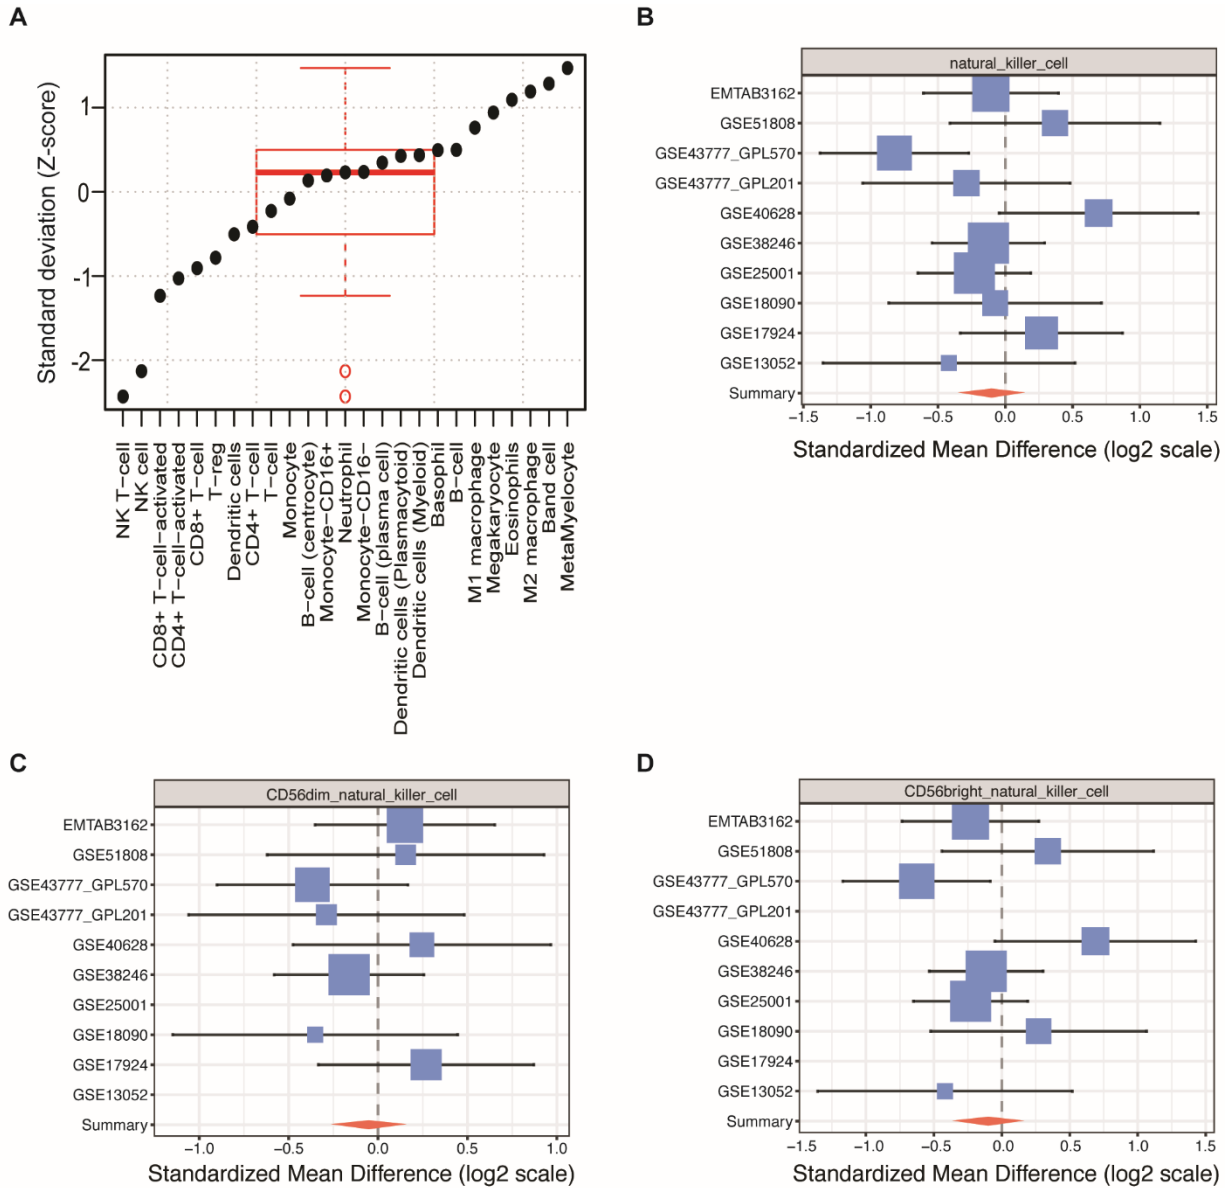

**Figure S4. Enrichment profiles of the 20 differentially expressed genes in publicly available sorted-cell gene expression profiles and meta-analysis of cell-mixture deconvolution, Related to Figure 1.** A. Y-axis shows standard deviations from the mean. Standardized enrichment scores (z scores, dots) for human immune cell types for the 20-gene set and a box plot of z score distributions are shown. B-D. Forest plots of total NK (B), CD56 dim NK (C), and CD56 bright NK (D) cell numbers determined by meta-analysis of cell-mixture deconvolution using immunoStates of blood transcriptome profiles of uncomplicated versus severe dengue patients in the discovery and validation cohorts. X-axis represents standardized mean difference between DHF/DSS and DF. The size of the blue rectangles is inversely proportional to the standard error of mean in the study. Whiskers represent the 95% CI. Red diamonds represent overall, combined mean difference for a given gene. Width of the diamonds represents the 95% CI of overall combined mean difference.  $p > 0.4$ ,  $FDR > 80\%$  for all panels.



|             | Platform   | Year | Reference   | Use        | Country   | Sample      | Age             | Controls Used | Cases Used | Total Used | Total Available | Timing of samples                                 | Day 0                                |
|-------------|------------|------|-------------|------------|-----------|-------------|-----------------|---------------|------------|------------|-----------------|---------------------------------------------------|--------------------------------------|
| GSE13052    | GPL2700    | 2009 | Long, HT    | Discovery  | Vietnam   | Whole blood | Children        | 9             | 9          | 18         | 30              | Day 4 from symptoms, at time of admission, Day 30 | fever                                |
| GSE25001    | GPL6104    | 2010 | Hoang, LT   | Discovery  | Vietnam   | Whole blood | Children/Adults | 69            | 32         | 101        | 112             | Day 2-10, follow up, days until defervescence     | fever                                |
| GSE38246    | GPL15615   | 2012 | Popper, SJ  | Discovery  | Nicaragua | PBMCs       | Children        | 46            | 42         | 88         | 113             | Days 2-12                                         | fever                                |
| GSE43777    | GPL201     | 2013 | Sun, P      | Discovery  | Venezuela | PBMCs       | Children/Adults | 88            | 7          | 95         | 269             | Day 0-5, post-defervescence, convalescence        | admission; fever <120 hrs            |
| GSE43777    | GPL570     | 2013 | Sun, P      | Discovery  | Venezuela | PBMCs       | Children/Adults | 29            | 26         | 55         | 269             | Day 0-5, post-defervescence, convalescence        | admission; fever <120 hrs            |
| GSE51808    | GPL13158   | 2014 | Kwissa, M   | Discovery  | Thailand  | Whole blood | Children/Adults | 18            | 10         | 28         | 56              | Day 2-9 (avg D5), follow up                       | fever                                |
| E-MTAB-3162 | GPL570     | 2012 | Van de Weg  | Discovery  | Indonesia | Whole blood | Adults          | 31            | 30         | 61         | 76              | Day 0-6                                           | admission, but within 48 hr of fever |
|             | <b>Sum</b> |      |             |            |           |             |                 |               |            | <b>446</b> |                 |                                                   |                                      |
| GSE17924    | GPL4133    | 2010 | Devignot, S | Validation | Cambodia  | Whole blood | Children        | 16            | 32         | 48         | 48              | Day 3-7, shock onset, sampling                    | fever                                |
| GSE18090    | GPL570     | 2009 | Nascimento  | Validation | Brazil    | PBMCs       | Adults          | 8             | 10         | 18         | 26              | Day 1-8                                           | fever                                |
| GSE40628    | GPL16021   | 2007 | Simmons     | Validation | Vietnam   | Whole blood | Adults          | 4             | 14         | 18         | 34              | Day 4-12, late follow up                          | fever                                |
|             | <b>Sum</b> |      |             |            |           |             |                 |               |            | <b>84</b>  |                 |                                                   |                                      |

**Table S1.** Publicly available datasets used for the discovery and validation of the 20-gene set, Related to Figures 1 and 2.

|    | Gene Symbol | Gene name                                                      | Expression in SD | Function                                                                               |
|----|-------------|----------------------------------------------------------------|------------------|----------------------------------------------------------------------------------------|
| 1  | DEFA4       | Defensin Alpha 4                                               | Over             | Innate immunity (neutrophils), antimicrobial, cytotoxic                                |
| 2  | GYG1        | Glycogenin 1                                                   | Over             | Innate immunity, glucose metabolism (glycosyltransferase)                              |
| 3  | TOR3A       | Torsin Family 3 Member A                                       | Over             | Interferon response                                                                    |
| 4  | PTPRM       | Protein Tyrosine Phosphatase, Receptor Type M                  | Under            | Innate immunity, cell adhesion, tyrosine phosphatase, lipid metabolism                 |
| 5  | SPON2       | Spondin 2                                                      | Under            | Innate immunity, cell adhesion, opsonization                                           |
| 6  | GRAP2       | GRB2-Related Adaptor Protein 2                                 | Under            | Leukocyte-specific protein tyrosine kinase signaling, viral clearance and pathogenesis |
| 7  | CACNA2D2    | Calcium Voltage-Gated Channel Auxiliary Subunit Alpha2 delta 3 | Under            | Innate immunity, calcium channel                                                       |
| 8  | CACNA2D3    | Calcium Voltage-Gated Channel Auxiliary Subunit Alpha2 delta 3 | Under            | Calcium channel                                                                        |
| 9  | TMEM63C     | Transmembrane Protein 63C                                      | Under            | Calcium activated cation channel                                                       |
| 10 | AK5         | Adenylate Kinase 5                                             | Under            | Nucleoside kinase                                                                      |
| 11 | CHD3        | Chromodomain Helicase DNA Binding Protein 3                    | Under            | Chromatin remodeling, transcription regulation, interacts with DENV proteins           |
| 12 | CX3CR1      | C-X3-C Motif Chemokine Receptor 1                              | Under            | Innate immunity, chemokine receptor, leukocytes adhesion and migration                 |
| 13 | TRERF1      | Transcriptional Regulating Factor 1                            | Under            | Transcription regulation                                                               |
| 14 | GBP2        | Guanylate Binding Protein 2                                    | Under            | Innate immunity, interferon gamma signaling, GTPase, antiviral, oxidative killing      |
| 15 | SERINC5     | Serine Incorporator 5                                          | Under            | Amino acid synthesis, restricts HIV infectivity                                        |
| 16 | SOX13       | SRY-Box 13                                                     | Under            | Transcription regulation, cell fate, ERK and WNT signaling                             |
| 17 | NCR3        | Natural Cytotoxicity Triggering Receptor 3                     | Under            | Innate immunity, NK cell receptor                                                      |
| 18 | ABI3        | ABI Family Member 3                                            | Under            | Regulation of actin polymerization                                                     |
| 19 | C3orf18     | Chromosome 3 Open Reading Frame 1                              | Under            | Uncharacterized                                                                        |
| 20 | ENPP5       | Ectonucleotide Pyrophosphatase/Phosphodiesterase 5             | Under            | Transmembrane glycoprotein                                                             |

**Table S2.** Over-expressed and under-expressed genes identified in the discovery cohort via the multi-cohort analysis, Related to Figure 1.

|                            |                           | Dengue<br>(N=9) | Dengue<br>with WS<br>(N=17) | Severe<br>dengue<br>(N=8) |
|----------------------------|---------------------------|-----------------|-----------------------------|---------------------------|
| Age                        | Adult                     | 8               | 9                           | 6                         |
|                            | Child (<17 years)         | 1               | 8                           | 2                         |
| Gender                     | Male                      | 4               | 7                           | 0                         |
|                            | Female                    | 5               | 10                          | 8                         |
| First sample day           | Mean (range)              | 3.5 (0-5)       | 3.2 (0-8)                   | 2.7 (1-4)                 |
| Dengue<br>diagnostics      | Positive NS1 Ag           | 4               | 10                          | 5                         |
|                            | Positive DENV IgM         | 8               | 15                          | 6                         |
| Dengue exposure            | Primary                   | 4               | 6                           | 2                         |
|                            | Secondary                 | 4               | 11                          | 6                         |
|                            | Undetermined              | 1               |                             |                           |
| Dengue serotype            | DENV-1                    | 1               |                             |                           |
|                            | DENV-3                    | 1               | 7                           | 4                         |
|                            | DENV-4                    | 1               | 2                           | 1                         |
|                            | DENV-2+4                  |                 | 1                           |                           |
|                            | Unknown                   | 6               | 7                           | 3                         |
| Clinical<br>manifestations | Shock N (%)               | 0 (0)           | 0 (0)                       | 6 (17.6)                  |
|                            | Plasma leakage N (%)      | 0 (0)           | 3 (8.8)                     | 4 (11.7)                  |
|                            | Severe organ damage N (%) | 0 (0)           | 0 (0)                       | 6 (17.6)                  |
|                            | Bleeding N (%)            | 0 (0)           | 8 (23.5)                    | 4 (11.7)                  |
|                            | Thrombocytopenia N (%)    | 1 (2.9)         | 8 (23.5)                    | 6 (17.6)                  |
|                            | Hemoconcentration N (%)   | 3 (8.8)         | 8 (23.5)                    | 3 (8.8)                   |

**Table S3.** Colombia cohort. Demographic, clinical, and laboratory characteristics of study population, Related to Figure 2.

| Patient num. | Shock criteria                                                                                | Pulse peak | Pulse Pressure nadir | MAP nadir | Vasoactive support | Transfusion | Ventilatory support | Severe organ damage | Hemorrhagic manifestations | Fluid accumulation | Thrombocytopenia | Dengue severity score |
|--------------|-----------------------------------------------------------------------------------------------|------------|----------------------|-----------|--------------------|-------------|---------------------|---------------------|----------------------------|--------------------|------------------|-----------------------|
|              | 0=None<br>1= Weak Pulse<br>2= Cold/Clammy skin<br>3= Restlessness<br>4= Hypotension (<65mmHg) |            | mmHg                 | mmHg      |                    |             |                     |                     |                            |                    | <100,000         |                       |
| 1-001        | 1,2,3,4                                                                                       | 120        | 38                   | 56        | +                  | +           | +                   | +                   | -                          | +                  | +                | 5.72                  |
| 1-002        | 1,2,4                                                                                         | 140        | 29                   | 50.6      | +                  | +           | +                   | +                   | +                          | +                  | +                | 8.94                  |
| 1-010        | 1,4                                                                                           | 104        | 25                   | 44.3      | -                  | -           | -                   | +                   | +                          | +                  | +                | 3.90                  |
| 1-013        | 4                                                                                             | 98         | 19                   | 62.6      | -                  | -           | -                   | +                   | +                          | -                  | +                | 5.65                  |
| 1-017        | 0                                                                                             | 100        | 23                   | 71.6      | -                  | -           | -                   | -                   | +                          | -                  | +                | 3.50                  |
| 1-026        | 4                                                                                             | 85         | 35                   | 63        | -                  | -           | -                   | +                   | +                          | +                  | -                | 3.44                  |
| 1-029        | 2,4                                                                                           | 93         | 29                   | 44.6      | -                  | -           | -                   | -                   | -                          | -                  | -                | 6.67                  |
| 1-036        | 0                                                                                             | 99         | 22                   | 78.6      | -                  | -           | -                   | +                   | -                          | -                  | +                | (degraded RNA)        |

**Table S4.** Severe dengue patients in the Colombia cohort, Related to Figure 2.

**Table S5.** Colombia cohort. Demographic and clinical characteristics of study population, Related to Figure 2. Please, see separate Excel file.

|            | Dataset          | Sensitivity | Specificity |
|------------|------------------|-------------|-------------|
|            | GSE13052gpl2700  | 1.00        | 0.778       |
|            | GSE25001gpl6104  | 0.938       | 0.290       |
|            | GSE38246gpl15615 | 0.952       | 0.326       |
|            | GSE43777gpl201   | 1.00        | 0.670       |
| Discovery  | GSE43777gpl570   | 0.962       | 0.690       |
|            | GSE51808gpl13158 | 0.900       | 0.556       |
|            | EMTAB3162gpl570  | 0.933       | 0.323       |
|            | Mean             | 0.955       | 0.519       |
|            | SD               | 0.036       | 0.203       |
|            | GSE17924         | 0.969       | 0.250       |
|            | GSE18090         | 1.00        | 0.250       |
| Validation | GSE40628         | 0.929       | 0.500       |
|            | Mean             | 0.966       | 0.333       |
|            | SD               | 0.035       | 0.144       |
|            | D.DWS.SD         | 1.00        | 0.760       |
| Colombia   | DWS.SD           | 1.00        | 0.688       |
|            | DF.DHF.DSS       | 1.00        | 0.792       |

**Table S6.** Sensitivity and specificity of the 20-gene set in the pre-existing cohorts and new Colombia cohort, Related to Figures 1 and 2.
